# Supplementary material for: Nb-doped VOx/CeO2 catalyst for NH3-SCR of NOx at low temperatures
Source: Royal Society of Chemistry journal article supplement (doi:10.1039/c5ra02752g), 2015-01-01
Supplement: c5ra02752g1.pdf [file c5ra02752g1.pdf]

## **Nb-doped VO<sub>x</sub>/CeO<sub>2</sub> catalyst for NH<sub>3</sub>-SCR of NO<sub>x</sub> at low temperatures**

Zhihua Lian, Fudong Liu<sup>\*†</sup>, Hong He<sup>\*</sup>, Kuo Liu

State Key Joint Laboratory of Environment Simulation and Pollution Control,  
Research Center for Eco-Environmental Sciences, Chinese Academy of Sciences,  
Beijing 100085, PR China

<sup>\*</sup>Corresponding author. Fax: +86 10 62849123; Tel: +86 10 62849123; E-mail:  
fudongliu@lbl.gov, lfd1982@gmail.com (F. Liu); honghe@rcees.ac.cn (H. He)

<sup>†</sup> Present address: Materials Sciences Division, Lawrence Berkeley National  
Laboratory, 1 Cyclotron Road, Berkeley, CA 94720, United States

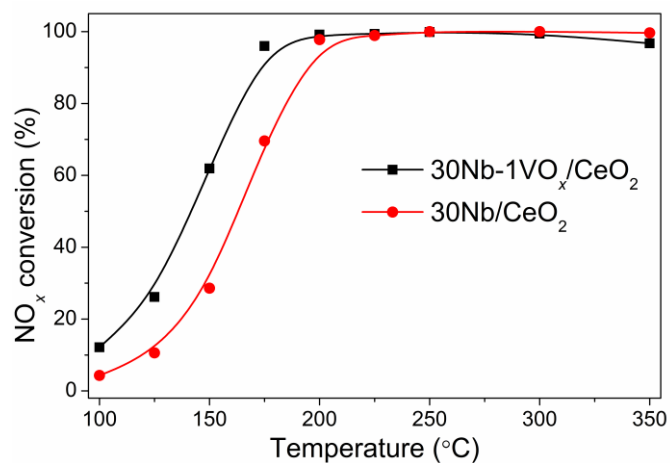

Fig. S1 NH<sub>3</sub>-SCR activity over 30Nb-1VO<sub>x</sub>/CeO<sub>2</sub> and 30Nb/CeO<sub>2</sub> catalysts.

Reaction conditions: [NO] = [NH<sub>3</sub>] = 500 ppm, [O<sub>2</sub>] = 5 vol. %, N<sub>2</sub> balance, total flow rate 500 ml/min and GHSV = 50 000 h<sup>-1</sup>.

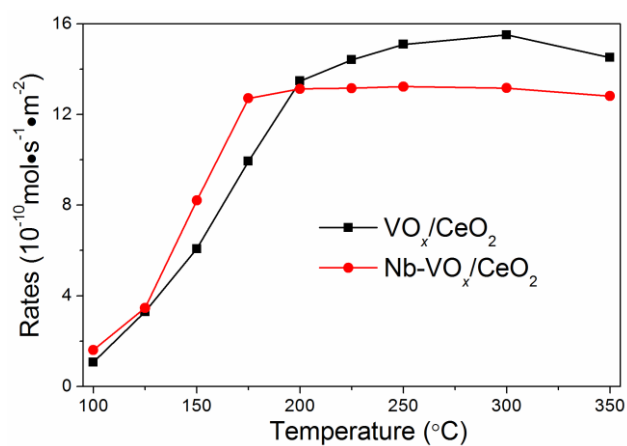

Fig. S2 The NH<sub>3</sub>-SCR reaction rates normalized by surface area over VO<sub>x</sub>/CeO<sub>2</sub> and 30Nb-VO<sub>x</sub>/CeO<sub>2</sub> catalysts.

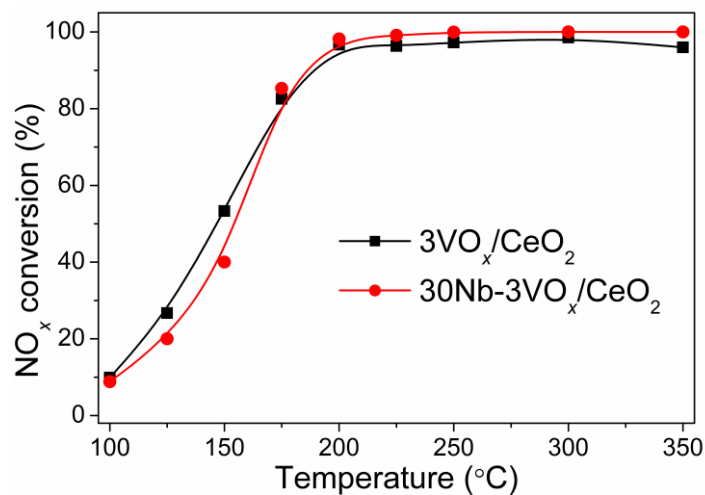

Fig. S3 NH<sub>3</sub>-SCR activity over 3VO<sub>x</sub>/CeO<sub>2</sub> and 30Nb-3VO<sub>x</sub>/CeO<sub>2</sub> catalysts.

Reaction conditions: [NO] = [NH<sub>3</sub>] = 500 ppm, [O<sub>2</sub>] = 5 vol. %, N<sub>2</sub> balance, total flow rate 500 ml/min and GHSV = 50 000 h<sup>-1</sup>.

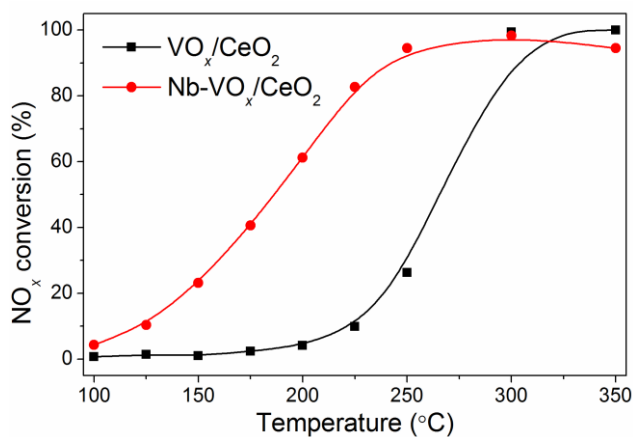

Fig. S4 NH<sub>3</sub>-SCR activity over 1VO<sub>x</sub>/CeO<sub>2</sub> and 30Nb-1VO<sub>x</sub>/CeO<sub>2</sub> catalysts after 100 ppm SO<sub>2</sub> poisoning for 48 h.

Reaction conditions: [NO] = [NH<sub>3</sub>] = 500 ppm, [O<sub>2</sub>] = 5 vol. %, N<sub>2</sub> balance, total flow rate 500 ml/min and GHSV = 50 000 h<sup>-1</sup>.

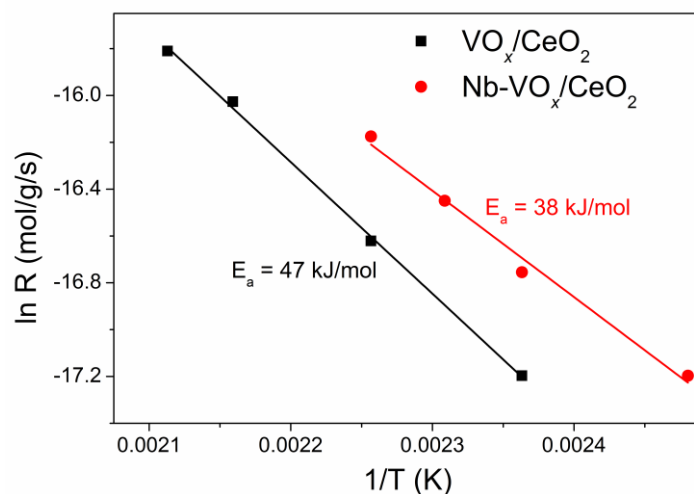

Fig. S5 Plots of rate (R) versus temperature of NO reduction over VO<sub>x</sub>/CeO<sub>2</sub> and 30Nb-1VO<sub>x</sub>/CeO<sub>2</sub> catalyst. Reaction conditions: total flow rate: 500 ml/min, mass of the catalyst: 100 mg (40-60 mesh), 500 ppm NO + 500 ppm NH<sub>3</sub> + 5% O<sub>2</sub>.

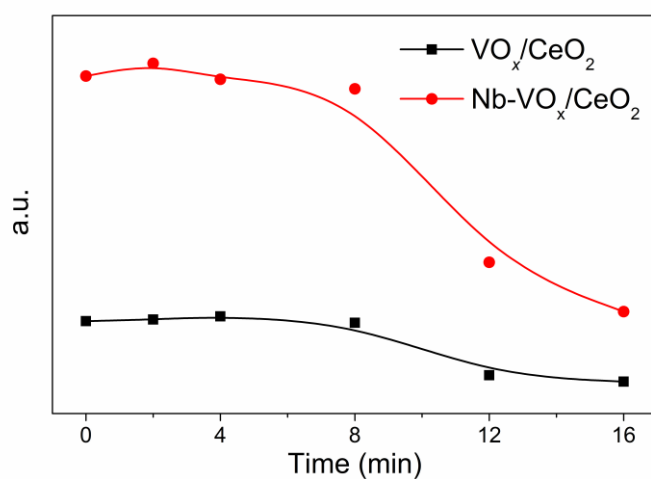

Fig. S6 The band intensities of adsorbed NH<sub>3</sub> species calculated from DRIFT spectra over 1VO<sub>x</sub>/CeO<sub>2</sub> and 30Nb-1VO<sub>x</sub>/CeO<sub>2</sub> pretreated by exposure to NH<sub>3</sub> followed by exposure to NO + O<sub>2</sub> at 175 °C.

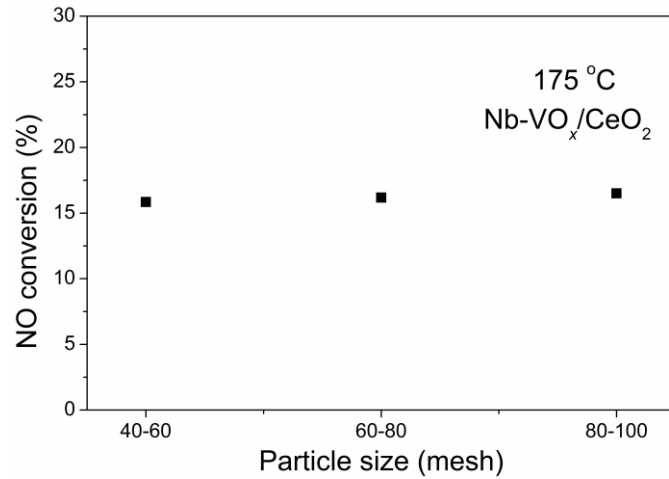

Fig. S7 Influence of particle-size-distribution on the NO conversion over 30Nb-1VO<sub>x</sub>/CeO<sub>2</sub> catalyst. Reaction conditions: total flow rate: 500 ml/min, mass of the catalyst: 100 mg, temperature: 175 °C, 500 ppm NO + 500 ppm NH<sub>3</sub> + 5% O<sub>2</sub>.

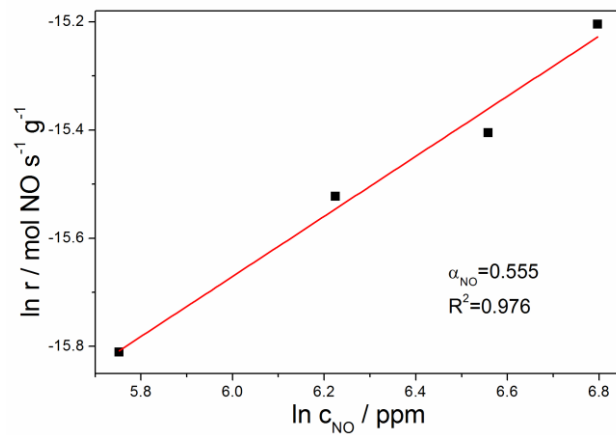

Fig. S8 Plot of  $\ln r$  to  $\ln c_{\text{NO}}$  over 30Nb-1VO<sub>x</sub>/CeO<sub>2</sub> catalyst. Reaction conditions: total flow rate: 500 ml/min, mass of the catalyst: 100 mg (40-60 mesh), temperature: 175 °C, 200-900 ppm NO + 500 ppm NH<sub>3</sub> + 5% O<sub>2</sub>.
